# Supplementary material for: Medical specialist attendance in nursing homes
Source: PubMed Central journal article supplement — GMS Health Technol Assess. 2013 Apr 23;9:Doc02. doi: 10.3205/hta000108 (PMC3677380; doi:10.3205/hta000108), 2013-04-23
Supplement: HTA-09-02-s-001.pdf [file HTA-09-02-s-001.pdf]

## A checklist for HTA related documents

This summary form is intended as an aid for those who wish to make a record of the extent to which a health technology assessment report meets the 14 questions given in the checklist.

It is **NOT** intended as a scorecard to rate the standard of HTA documents — reports may be valid and useful without meeting all the criteria that have been listed.

| Item                                                                                                                                                                                                                                                                                                             | Yes       | Partly                                                                          | No                   |                                     |                                     |                                                                                   |        |                                                                    |  |
|------------------------------------------------------------------------------------------------------------------------------------------------------------------------------------------------------------------------------------------------------------------------------------------------------------------|-----------|---------------------------------------------------------------------------------|----------------------|-------------------------------------|-------------------------------------|-----------------------------------------------------------------------------------|--------|--------------------------------------------------------------------|--|
| <b>Preliminary</b>                                                                                                                                                                                                                                                                                               |           |                                                                                 |                      |                                     |                                     |                                                                                   |        |                                                                    |  |
| 1. Appropriate contact details for further information?                                                                                                                                                                                                                                                          | X         |                                                                                 |                      |                                     |                                     |                                                                                   |        |                                                                    |  |
| 2. Authors identified?                                                                                                                                                                                                                                                                                           | X         |                                                                                 |                      |                                     |                                     |                                                                                   |        |                                                                    |  |
| 3. Statement regarding conflict of interest?                                                                                                                                                                                                                                                                     | X         |                                                                                 |                      |                                     |                                     |                                                                                   |        |                                                                    |  |
| 4. Statement on whether report externally reviewed?                                                                                                                                                                                                                                                              | X         |                                                                                 |                      |                                     |                                     |                                                                                   |        |                                                                    |  |
| 5. Short summary in non-technical language?                                                                                                                                                                                                                                                                      | X         |                                                                                 |                      |                                     |                                     |                                                                                   |        |                                                                    |  |
| <b>Why?</b>                                                                                                                                                                                                                                                                                                      |           |                                                                                 |                      |                                     |                                     |                                                                                   |        |                                                                    |  |
| 6. Reference to the policy question that is addressed?                                                                                                                                                                                                                                                           | X         |                                                                                 |                      |                                     |                                     |                                                                                   |        |                                                                    |  |
| 7. Reference to the research question(s) that is/are addressed?                                                                                                                                                                                                                                                  | X         |                                                                                 |                      |                                     |                                     |                                                                                   |        |                                                                    |  |
| 8. Scope of the assessment specified?                                                                                                                                                                                                                                                                            | X         |                                                                                 |                      |                                     |                                     |                                                                                   |        |                                                                    |  |
| 9. Description of the assessed health technology?                                                                                                                                                                                                                                                                | X         |                                                                                 |                      |                                     |                                     |                                                                                   |        |                                                                    |  |
| <b>How?</b>                                                                                                                                                                                                                                                                                                      |           |                                                                                 |                      |                                     |                                     |                                                                                   |        |                                                                    |  |
| 10. Details on sources of information and literature search strategies provided?<br>(In the document or within the published referenced document -><br><a href="http://portal.dimdi.de/de/hta/hta_berichte/hta298_bericht_de.pdf">http://portal.dimdi.de/de/hta/hta_berichte/hta298_bericht_de.pdf</a> (German)) |           |                                                                                 |                      |                                     |                                     |                                                                                   |        |                                                                    |  |
| Search strategy                                                                                                                                                                                                                                                                                                  | Databases | Year range                                                                      | Language restriction | Primary data                        | Other kind of information resources |                                                                                   |        |                                                                    |  |
| X                                                                                                                                                                                                                                                                                                                | X         | X                                                                               | X                    | X                                   | X                                   |                                                                                   |        |                                                                    |  |
| Complete reference list of included studies                                                                                                                                                                                                                                                                      |           | List of excluded studies                                                        |                      | Inclusion criteria                  |                                     | Exclusion criteria                                                                |        |                                                                    |  |
| X                                                                                                                                                                                                                                                                                                                |           | O                                                                               |                      | X                                   |                                     | X                                                                                 |        |                                                                    |  |
| 11. Information on basis for the assessment and interpretation of selected data and information?                                                                                                                                                                                                                 |           |                                                                                 |                      |                                     |                                     |                                                                                   |        |                                                                    |  |
| Method of data extraction described?                                                                                                                                                                                                                                                                             |           | Critical appraisal method (for quality assessment of the literature) described? |                      | Method of data synthesis described? |                                     | Results of the assessment clearly presented, e.g. in the form of evidence tables? |        |                                                                    |  |
| X                                                                                                                                                                                                                                                                                                                |           | X                                                                               |                      | X                                   |                                     | X                                                                                 |        |                                                                    |  |
| <b>Context?</b> (may or may not apply to each HTA)                                                                                                                                                                                                                                                               |           |                                                                                 |                      |                                     |                                     |                                                                                   |        |                                                                    |  |
| (Medico-) legal implications considered?                                                                                                                                                                                                                                                                         |           | Economic analysis provided?                                                     |                      | Ethical implications considered?    |                                     | Social implications considered?                                                   |        | Other perspectives (stakeholders, patients, consumers) considered? |  |
| X                                                                                                                                                                                                                                                                                                                |           | X                                                                               |                      | X                                   |                                     | X                                                                                 |        | X                                                                  |  |
| <b>What then?</b>                                                                                                                                                                                                                                                                                                |           |                                                                                 |                      |                                     |                                     | Yes                                                                               | Partly | No                                                                 |  |
| 12. Findings of the assessment discussed?                                                                                                                                                                                                                                                                        |           |                                                                                 |                      |                                     |                                     | X                                                                                 |        |                                                                    |  |
| 13. Conclusions from assessment clearly stated?                                                                                                                                                                                                                                                                  |           |                                                                                 |                      |                                     |                                     | X                                                                                 |        |                                                                    |  |
| 14. Suggestions for further action?                                                                                                                                                                                                                                                                              |           |                                                                                 |                      |                                     |                                     | X                                                                                 |        |                                                                    |  |
